# Supplementary material
Source: publisher site journal article supplement (https://www.dovepress.com/article/457978)
Supplement: Supplementary file 1 [file get_supplementary_file.php]

# Tumor cell-derived exosomal hybrid nanosystems loaded with rhubarbic acid and tanshinone IIA for sepsis treatment

Qian Wu†**,1**, Qing-Qing Dong†**,1**, Si-Hui Wang**1**, Yi Lu**1**, Yi Shi**1**, Xiao-Ling Xu***,2**, Wei Chen***,1**

1Longhua Hospital Affiliated to Shanghai University of Traditional Chinese Medicine, Shanghai, PR China;

**2**Shulan International Medical College, Zhejiang Shuren University, Hangzhou, PR China;

†These authors contributed equally.

*Correspondence to:

Dr. W. Chen (Longhua Hospital Affiliated to Shanghai University of Traditional Chinese Medicine), 725 South WanPing Road, Shanghai, 200032, China. Tel: +86-021-64385700-3522. E-mail: [cwdoctor@shutcm.edu.cn;](mailto:cwdoctor@shutcm.edu.cn;)

Dr. X. L. Xu (Shulan International Medical College, Zhejiang Shuren University), 8 Shuren Street, Hangzhou, 310015, China. E-mail: [ziyao1988@zju.edu.cn](mailto:ziyao1988@zju.edu.cn)


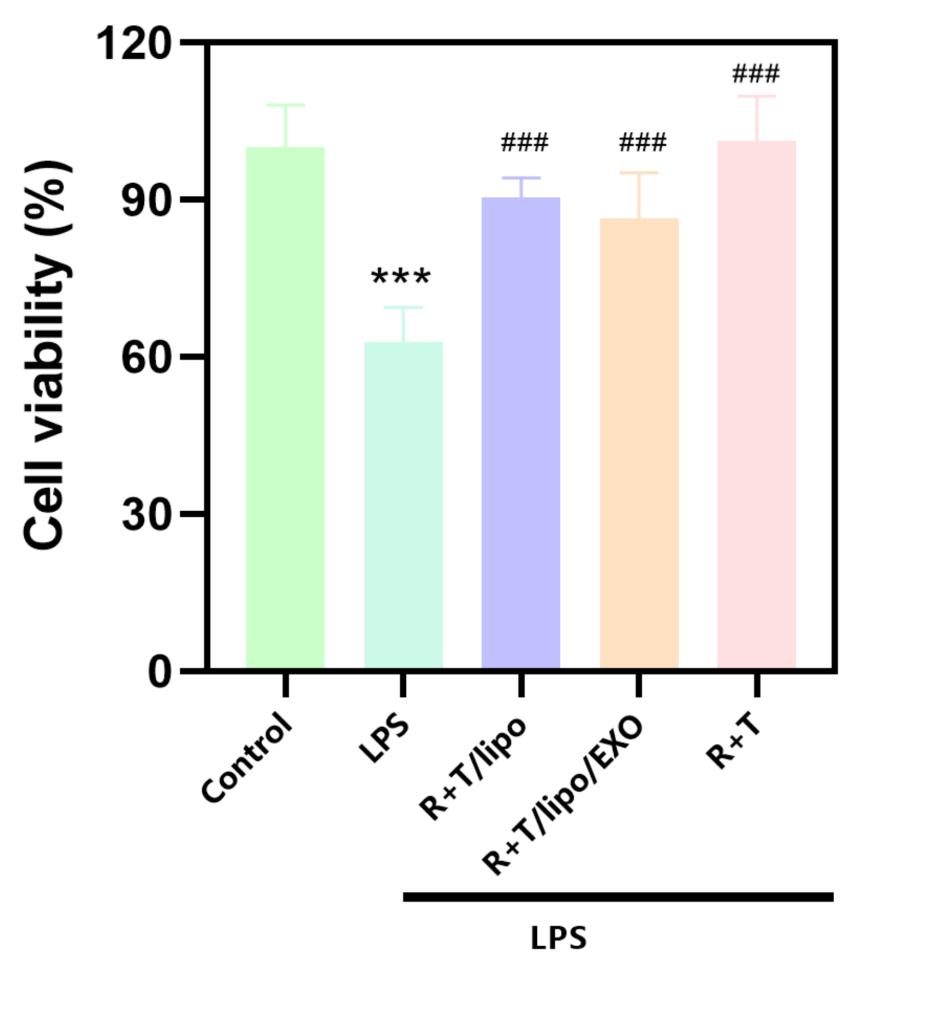


**Figure S1.** effects of different drug treatments on cell viability (compared with the normal group, *** *P*<0.001; compared with the LPS group, ### *P*<0.001)


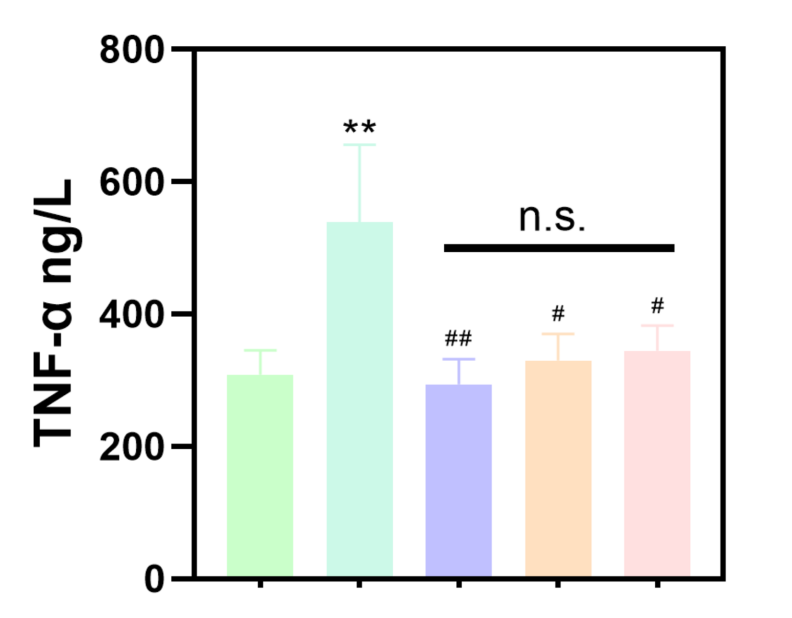

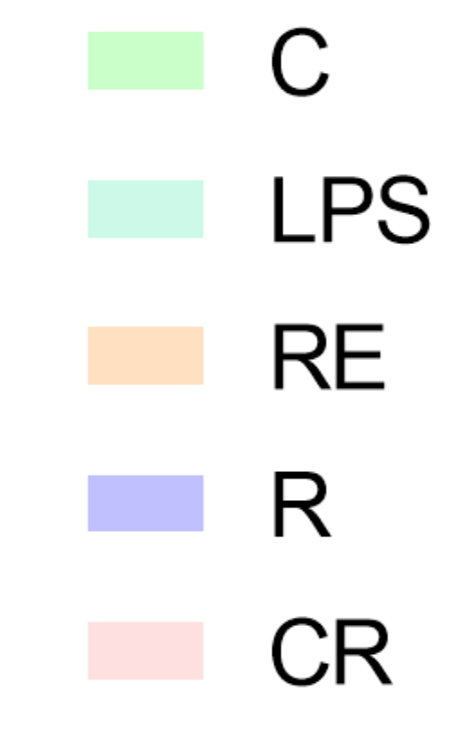


**Figure S2.** expression of inflammatory factors TNF-αof different drug treatments (compared with the normal group, ** *P*<0.01; compared with the LPS group, # *P*<0.05, ## *P*<0.01; C: Control group; LPS: LPS group; R: LPS+R+T/Lipo group; RE: LPS+R+T/Lipo/EXO group; CR: LPS+R+T group)


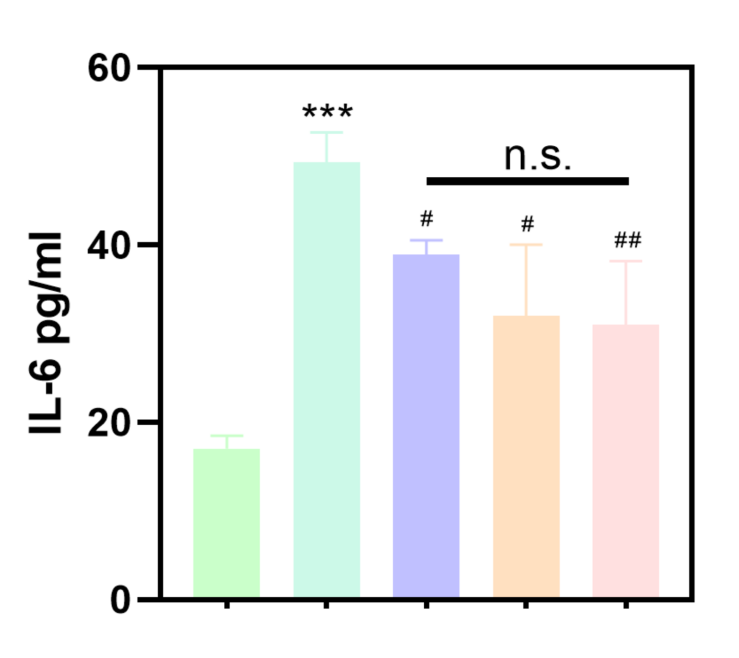

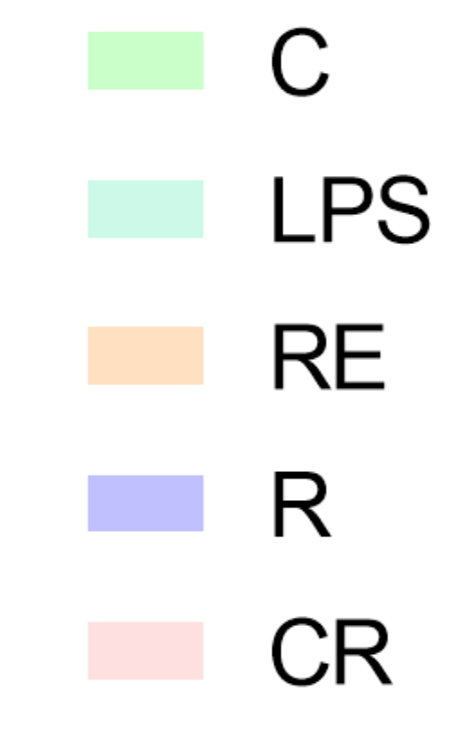


**Figure S3.** expression of inflammatory factors IL-6 of different drug treatments(compared with the normal group, *** *P*<0.001; compared with the LPS group, # *P*<0.05, ## *P*<0.01;C: Control group; LPS: LPS group; R: LPS+R+T/Lipo group; RE: LPS+R+T/Lipo/EXO group; CR: LPS+R+T group)
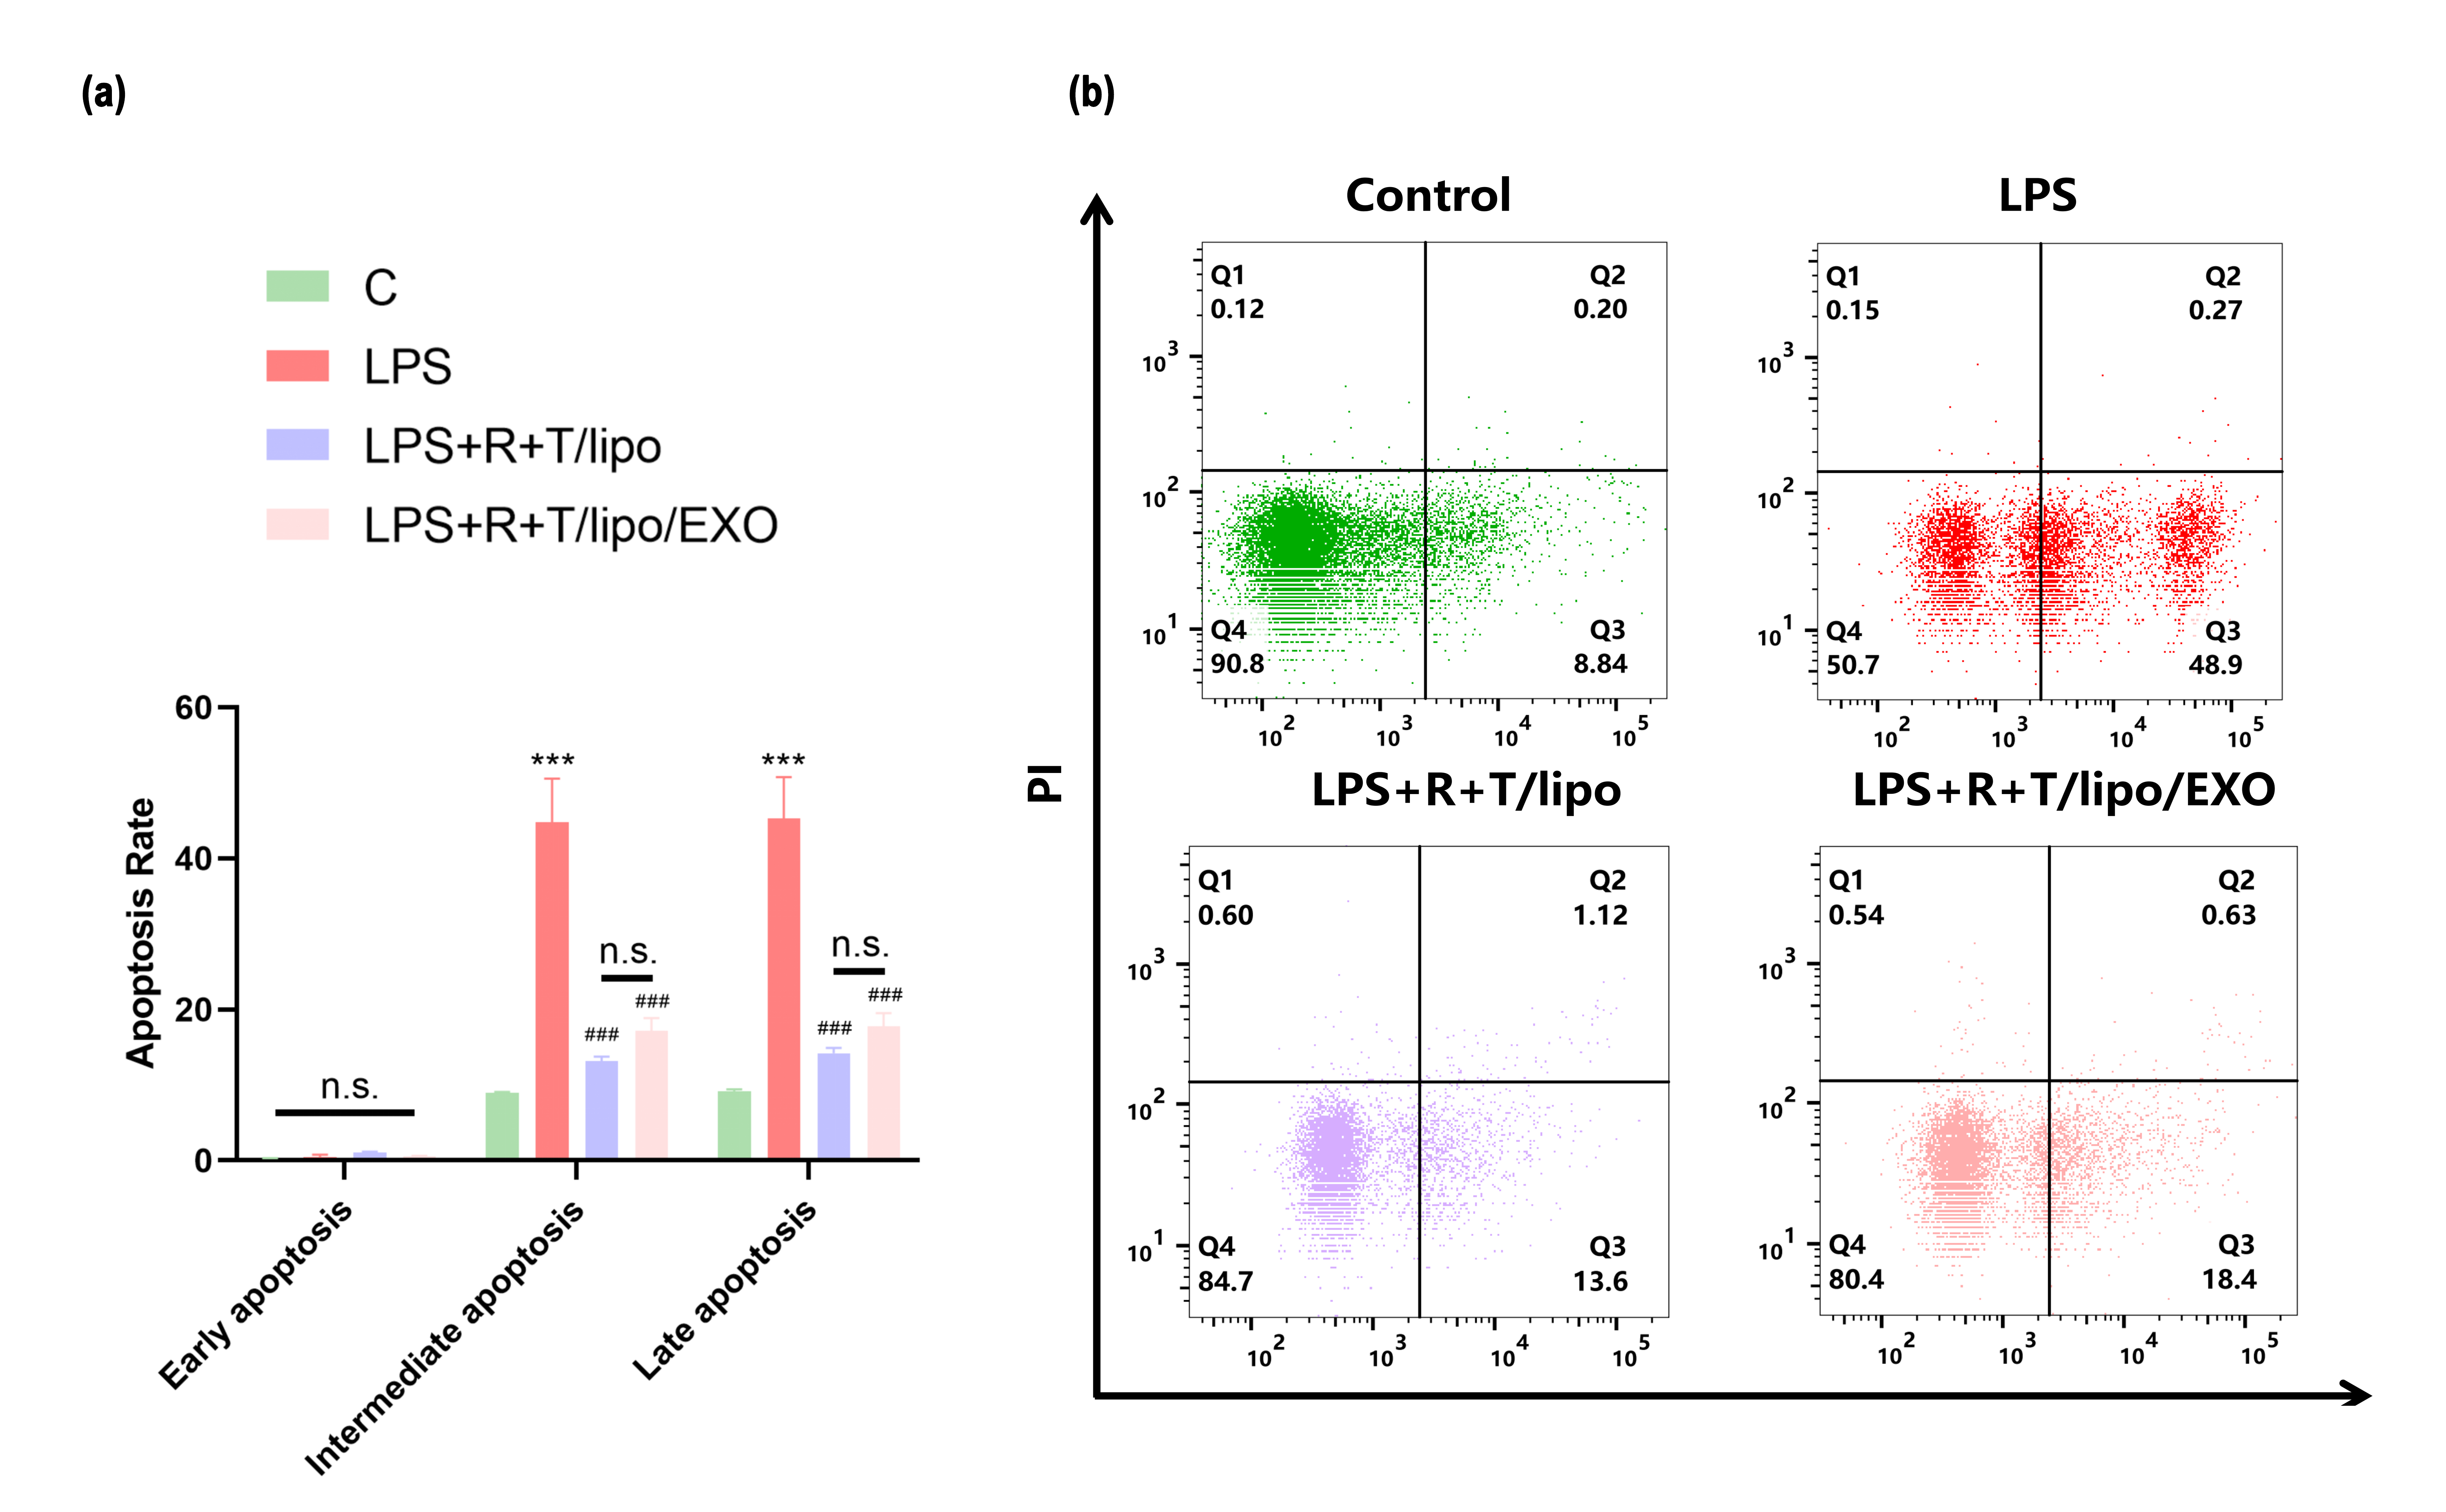


**Figure S4.** (a) flow cytometry analysis of the effect of nanocomposites on apoptosis (compared with the normal group, *** P<0.001; compared with the LPS group, ### P<0.001; n.s. no statistical difference);(b) flow cytometry detection of the effect of nanocomposites on apoptosis.


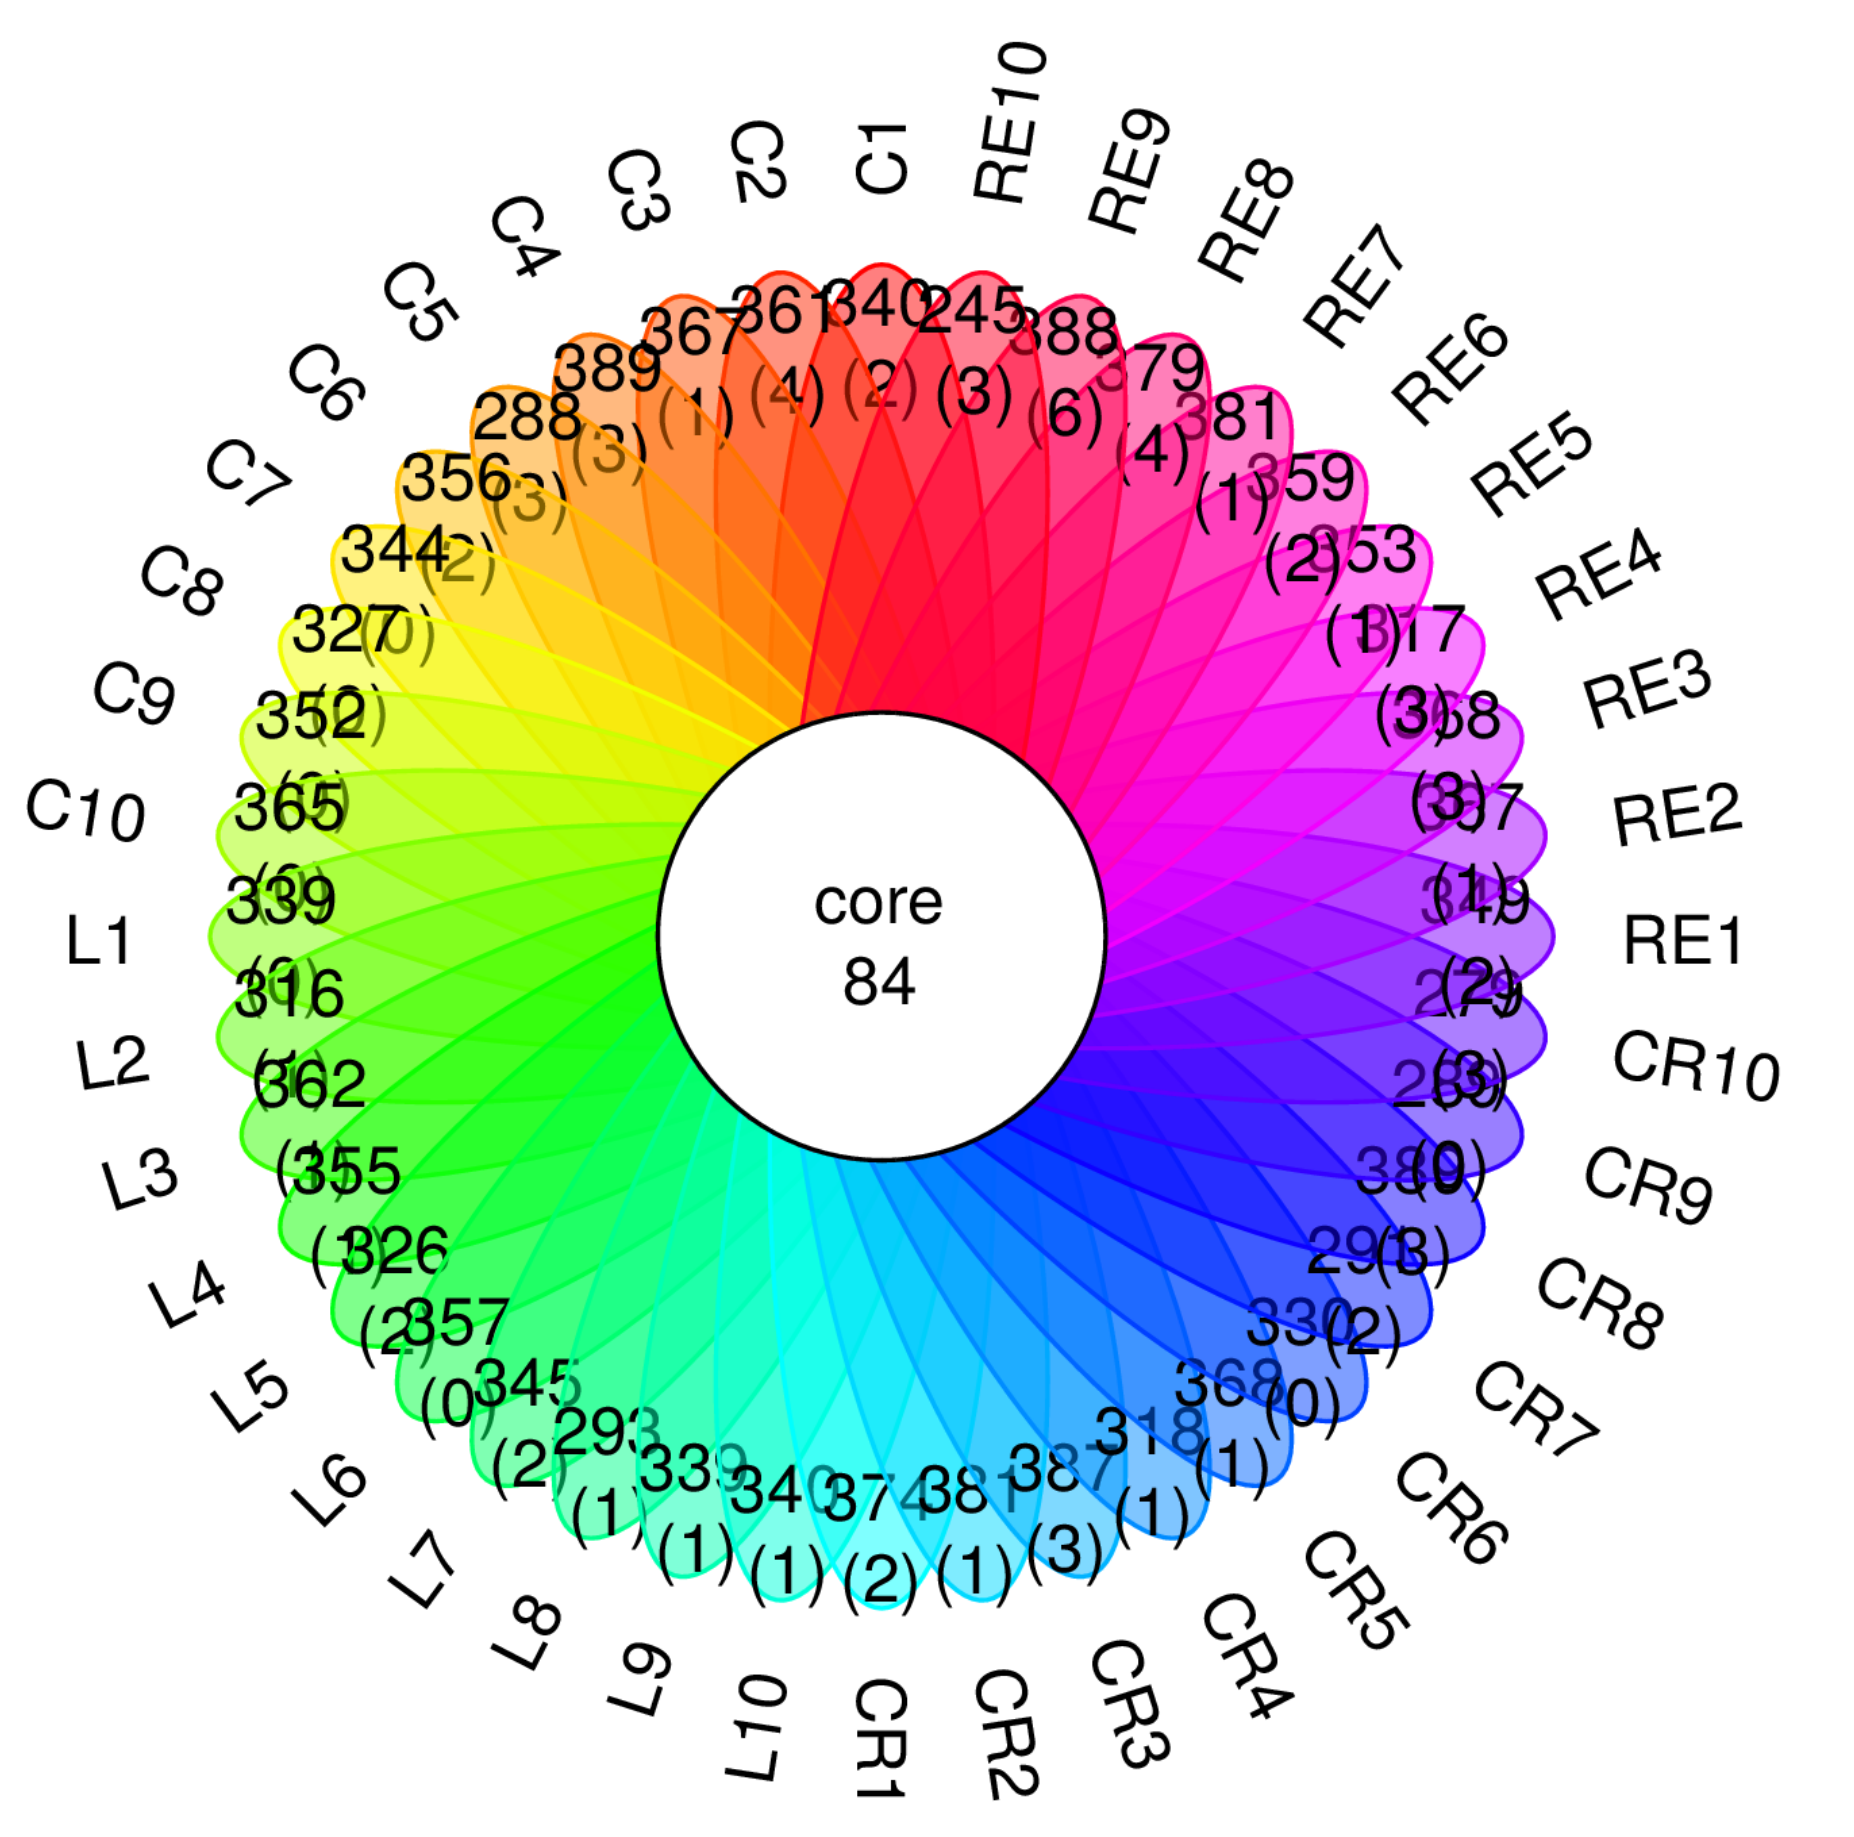


**Figure S5.** petal diagram of colony grouping;


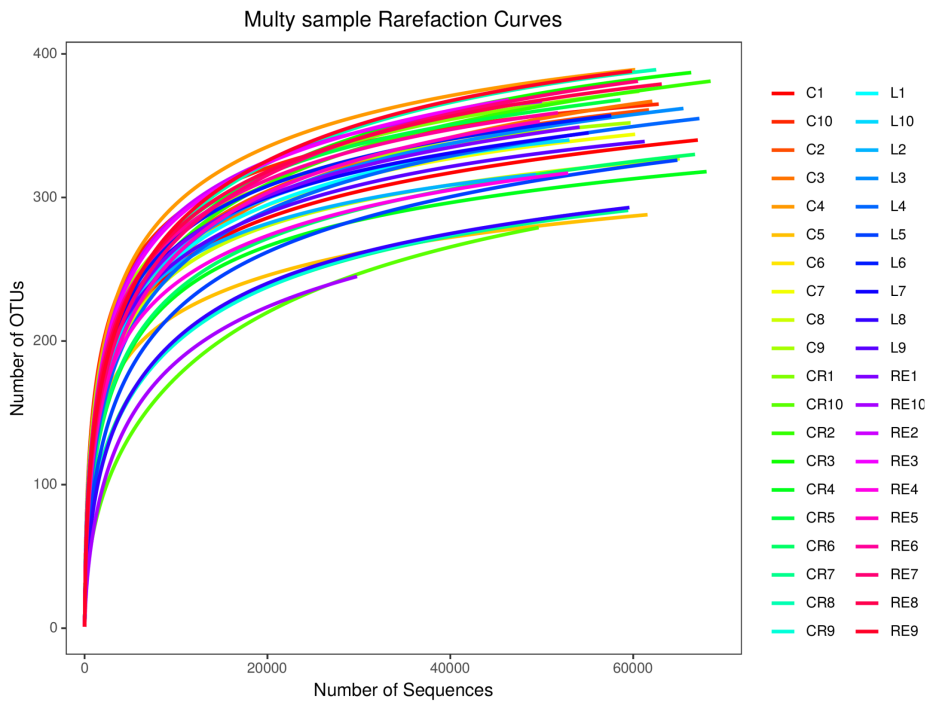


**Figure S6.** multy sample rarefaction curves;


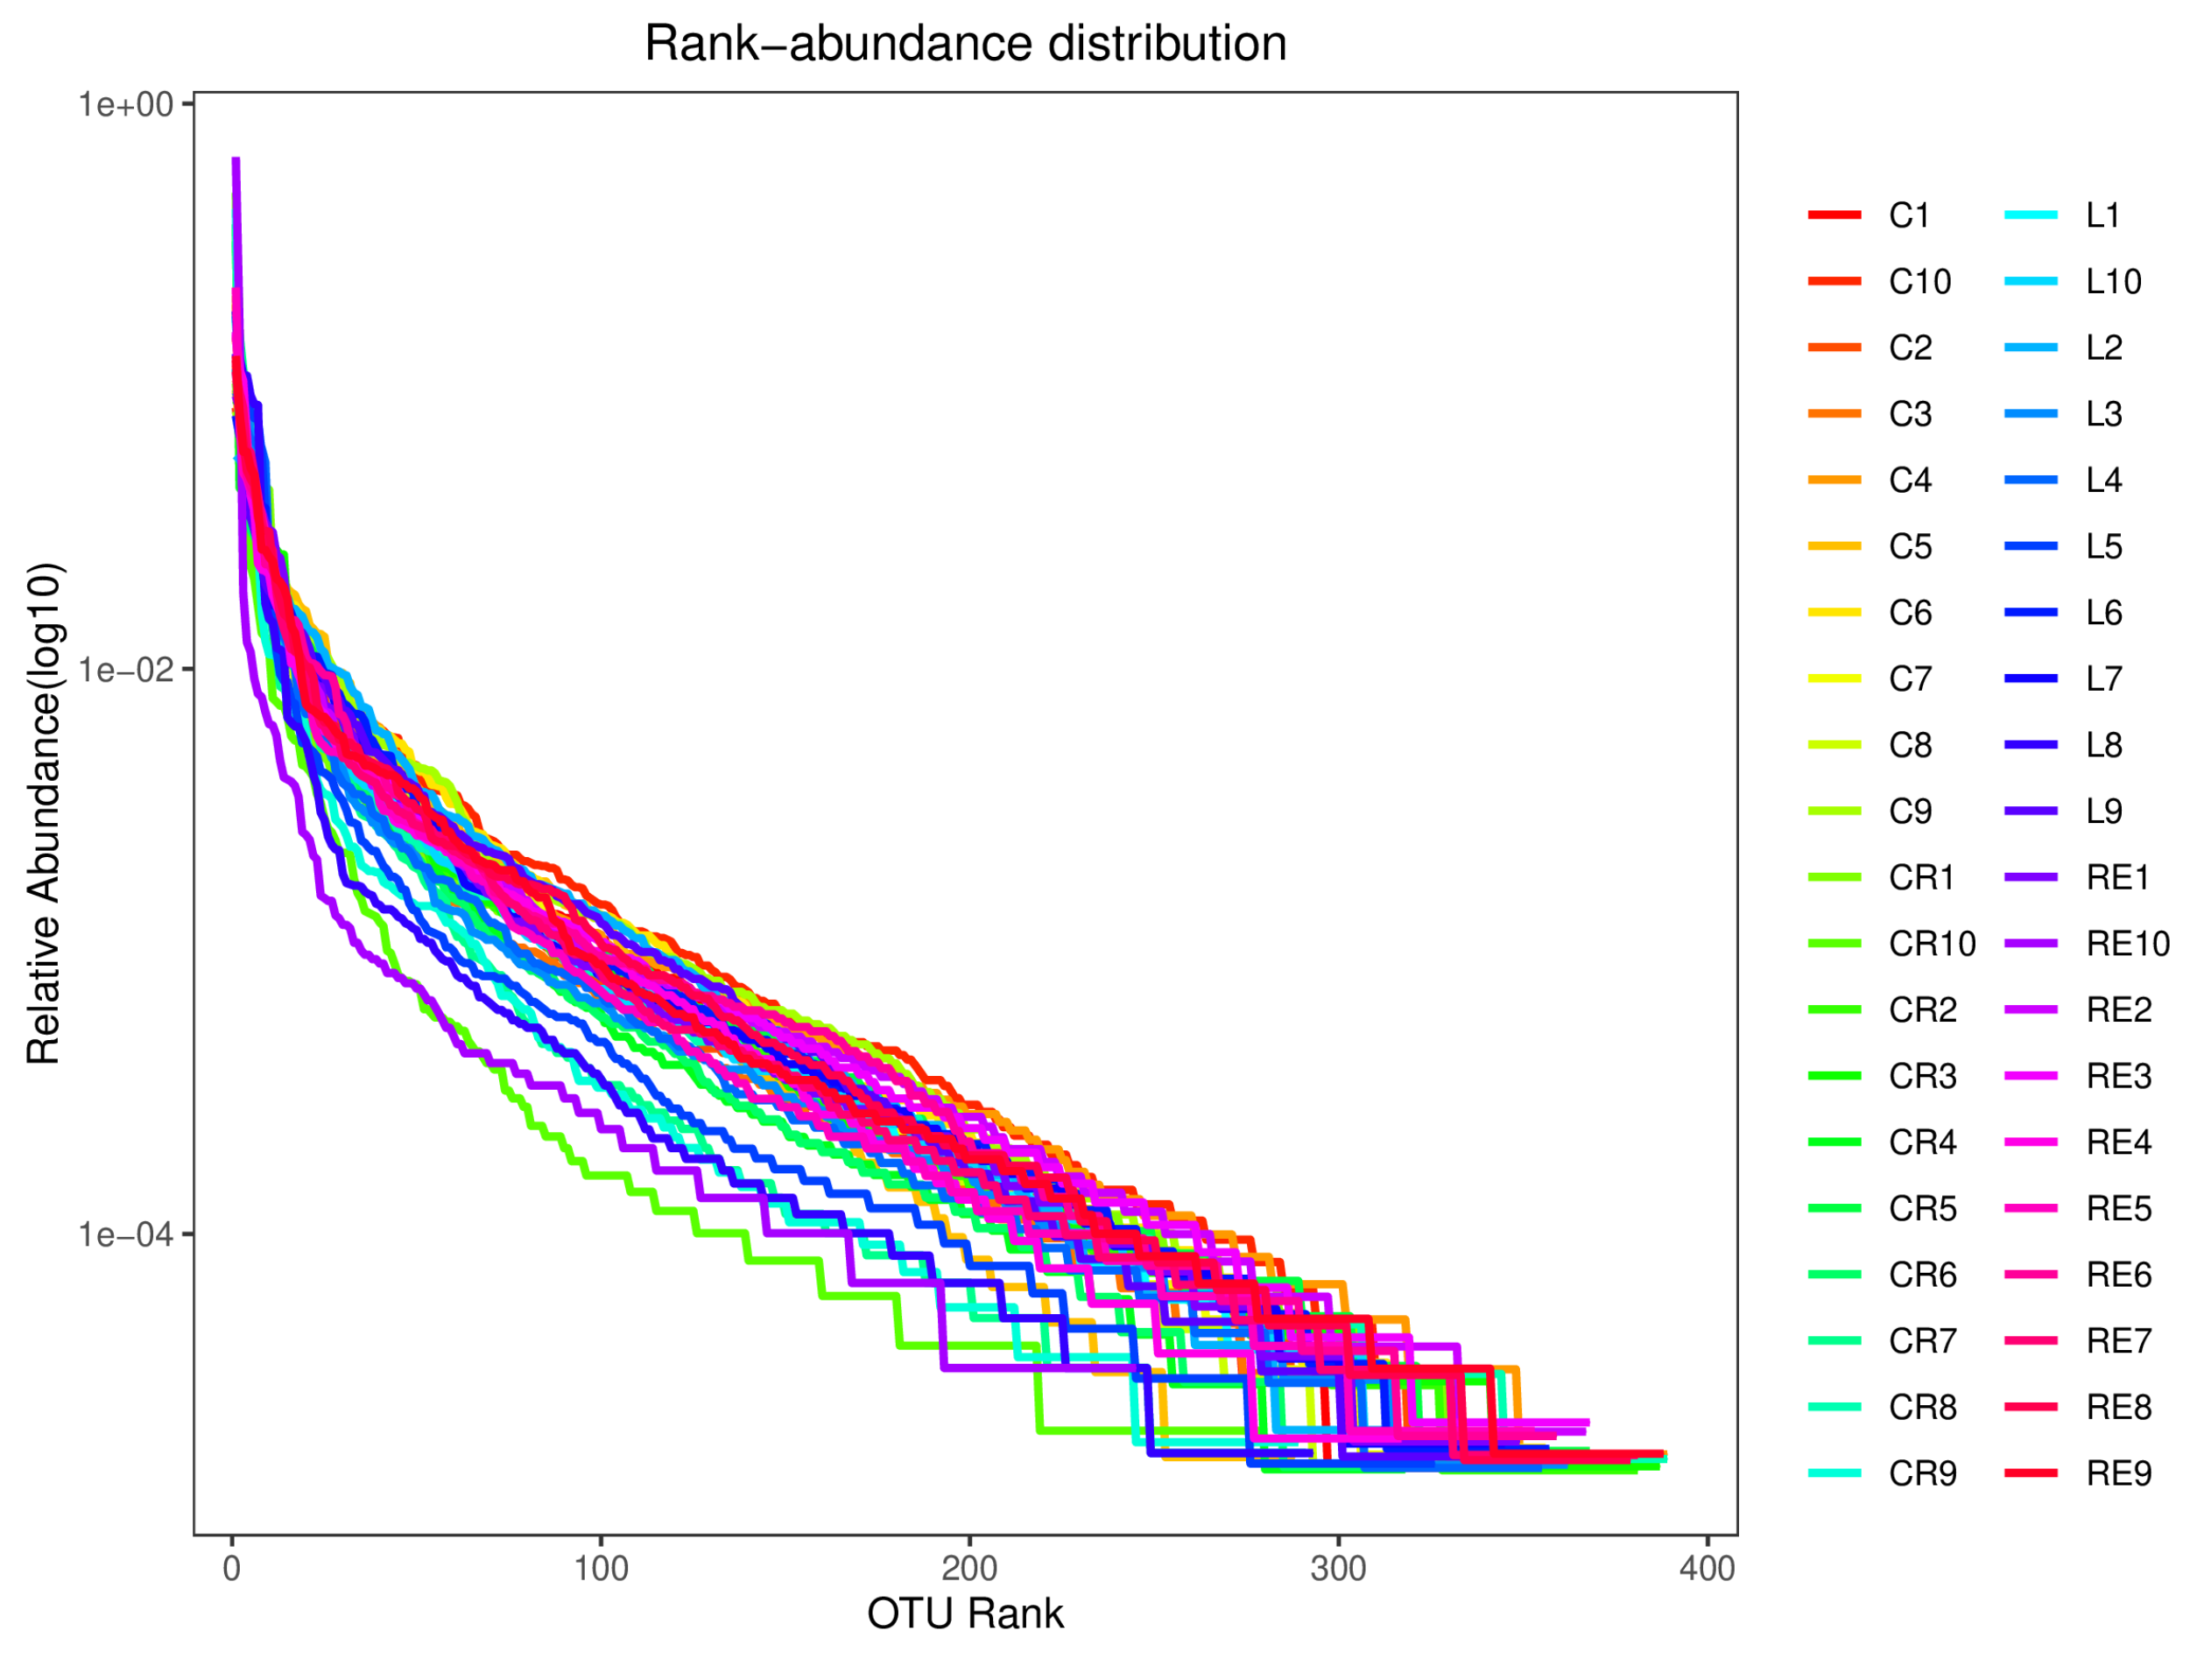


**Figure S7.** rank-bundance curve; Analysis of α-diversity of intestinal flora.


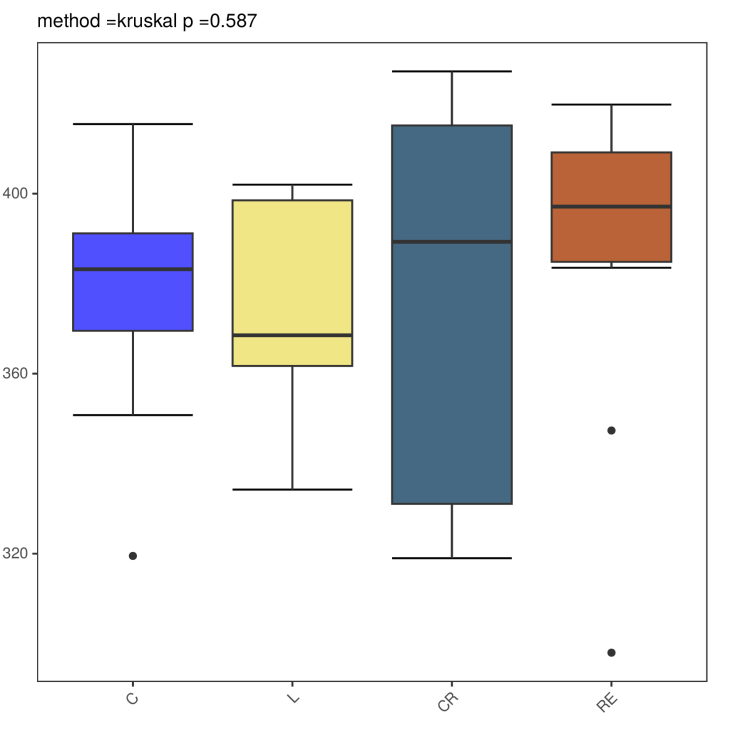


**Figure S8.** Chao index box plot; Analysis of β-diversity of intestinal flora.


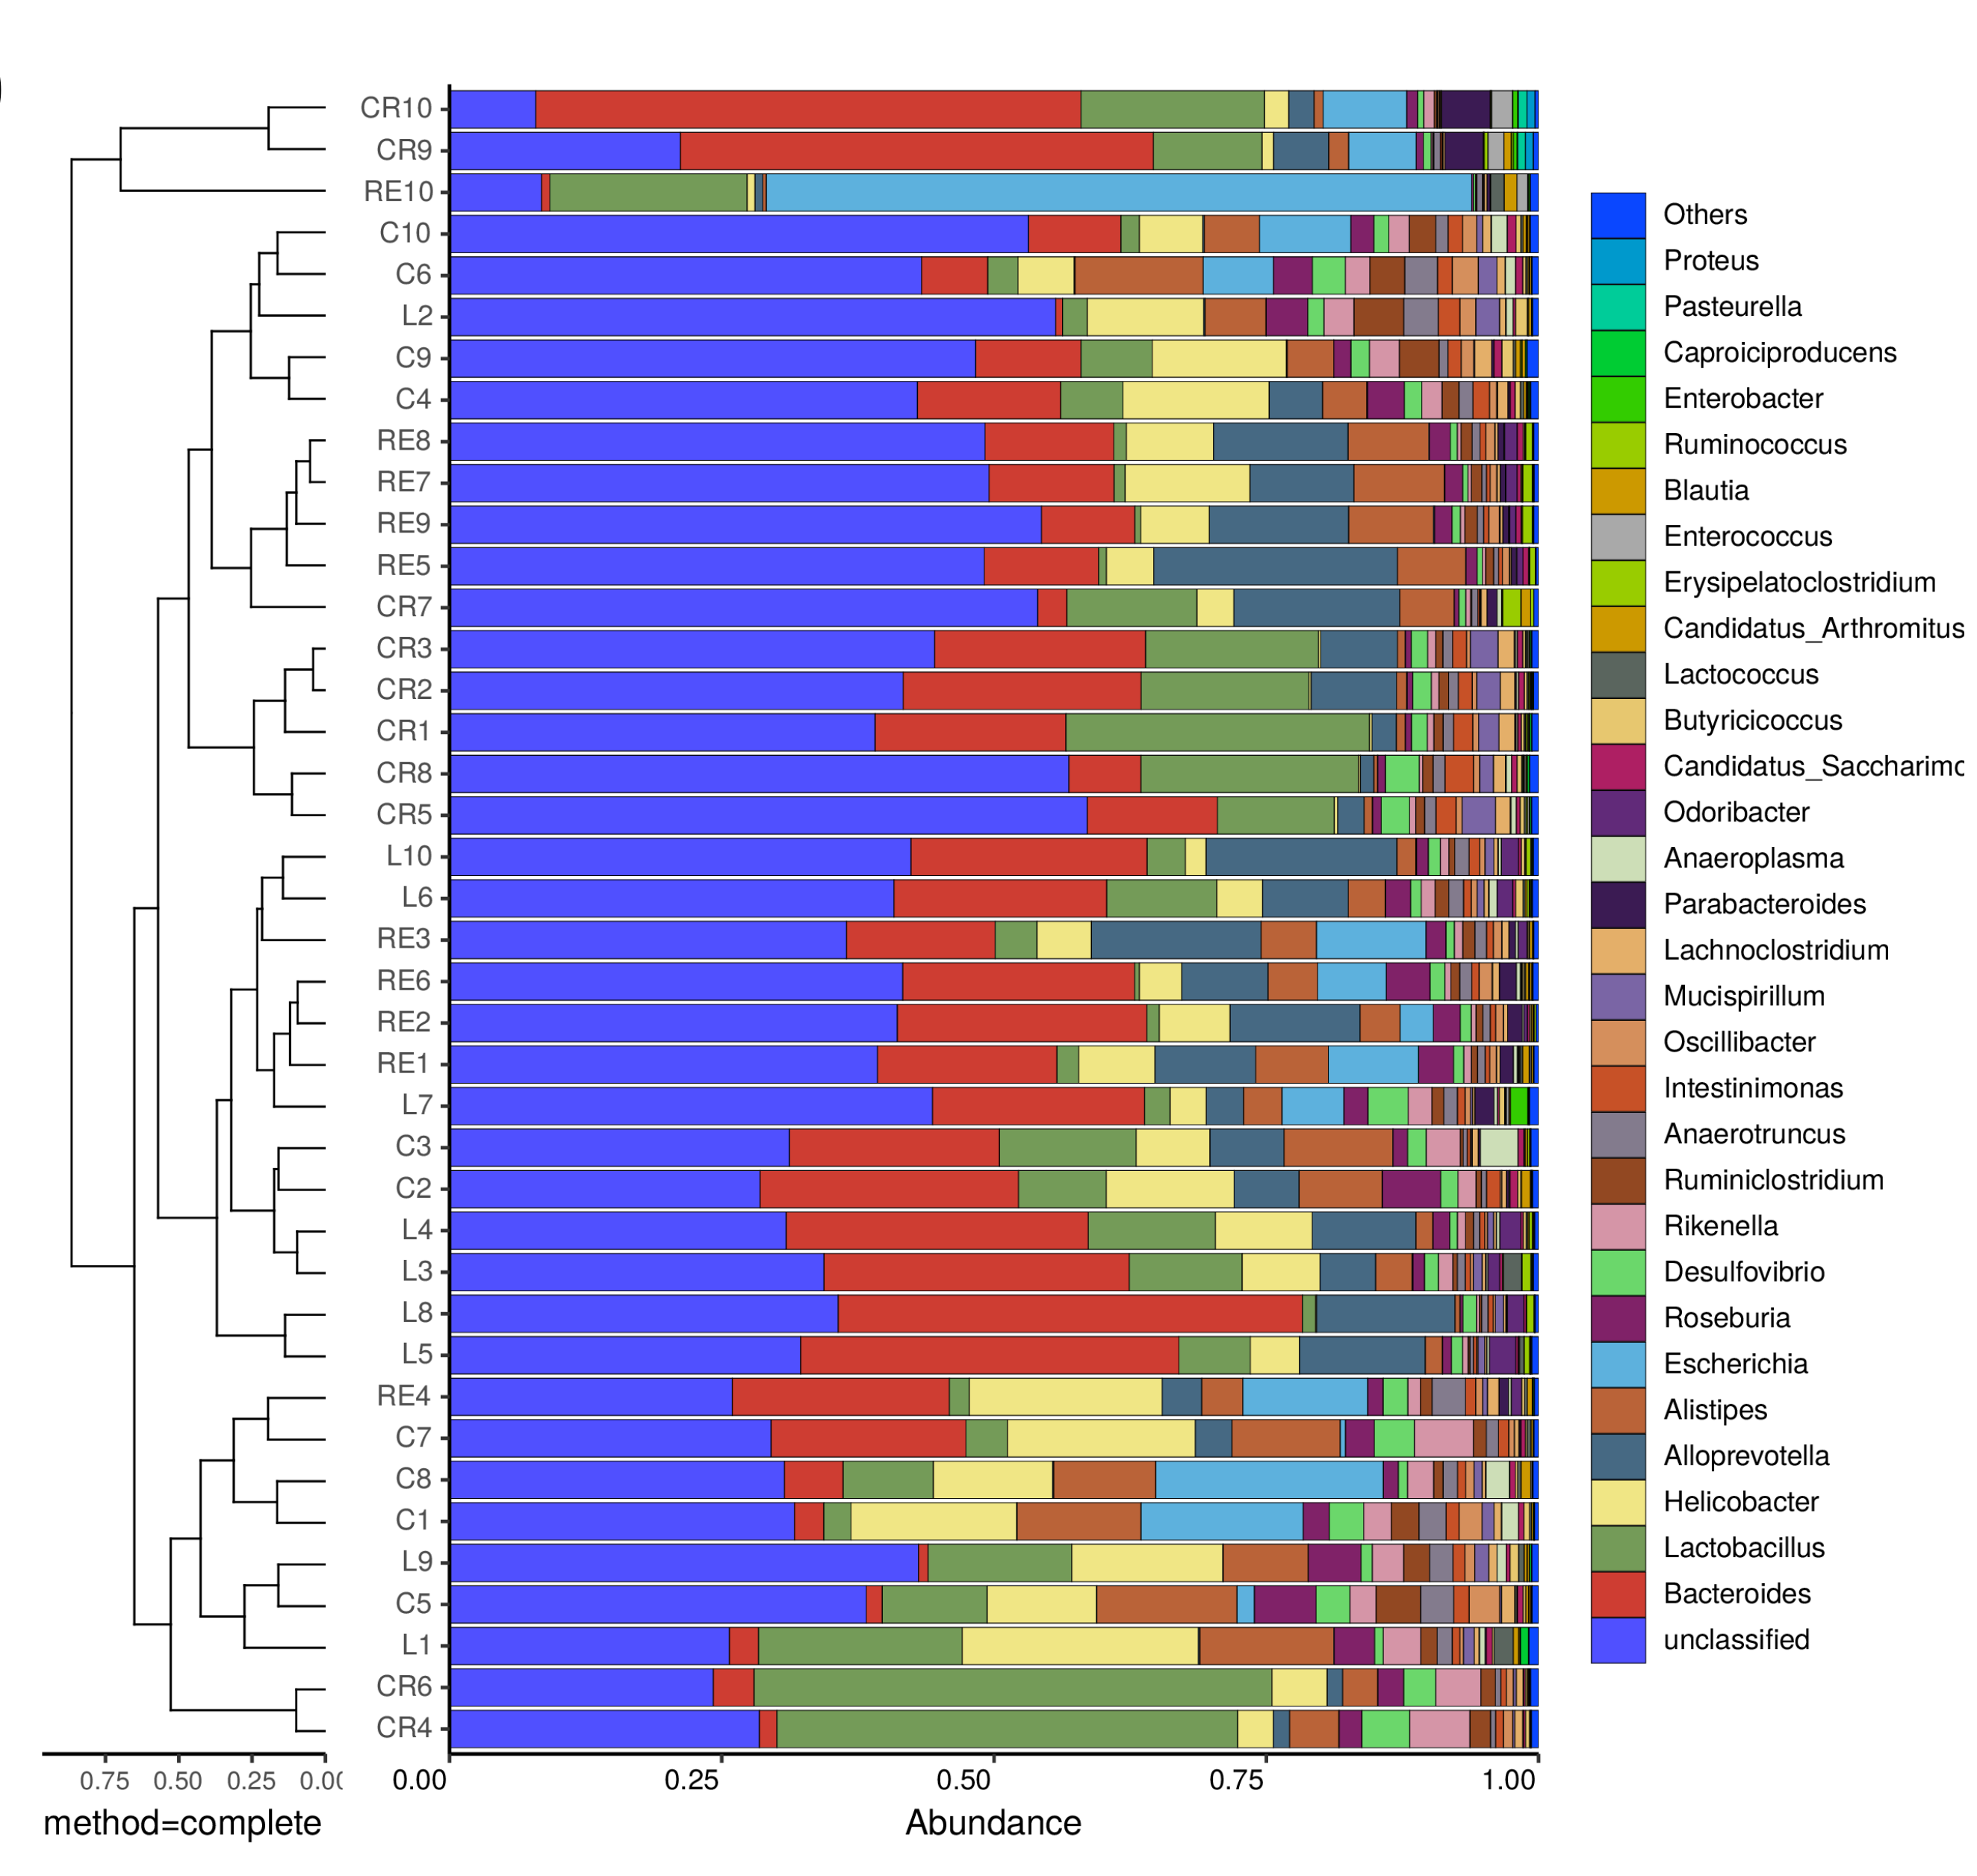


**Figure S9.** combination analysis diagram of cluster tree and bar chart of genus horizontal samples;


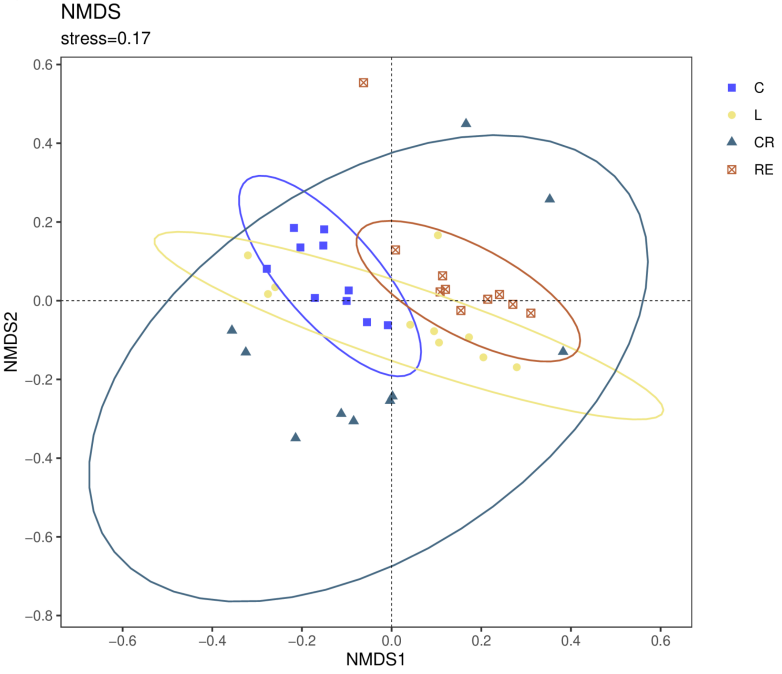


**Figure S10.** Beta-Bray Curtis.NMDS;(j) Beta-Bray Curtis.PCoA;


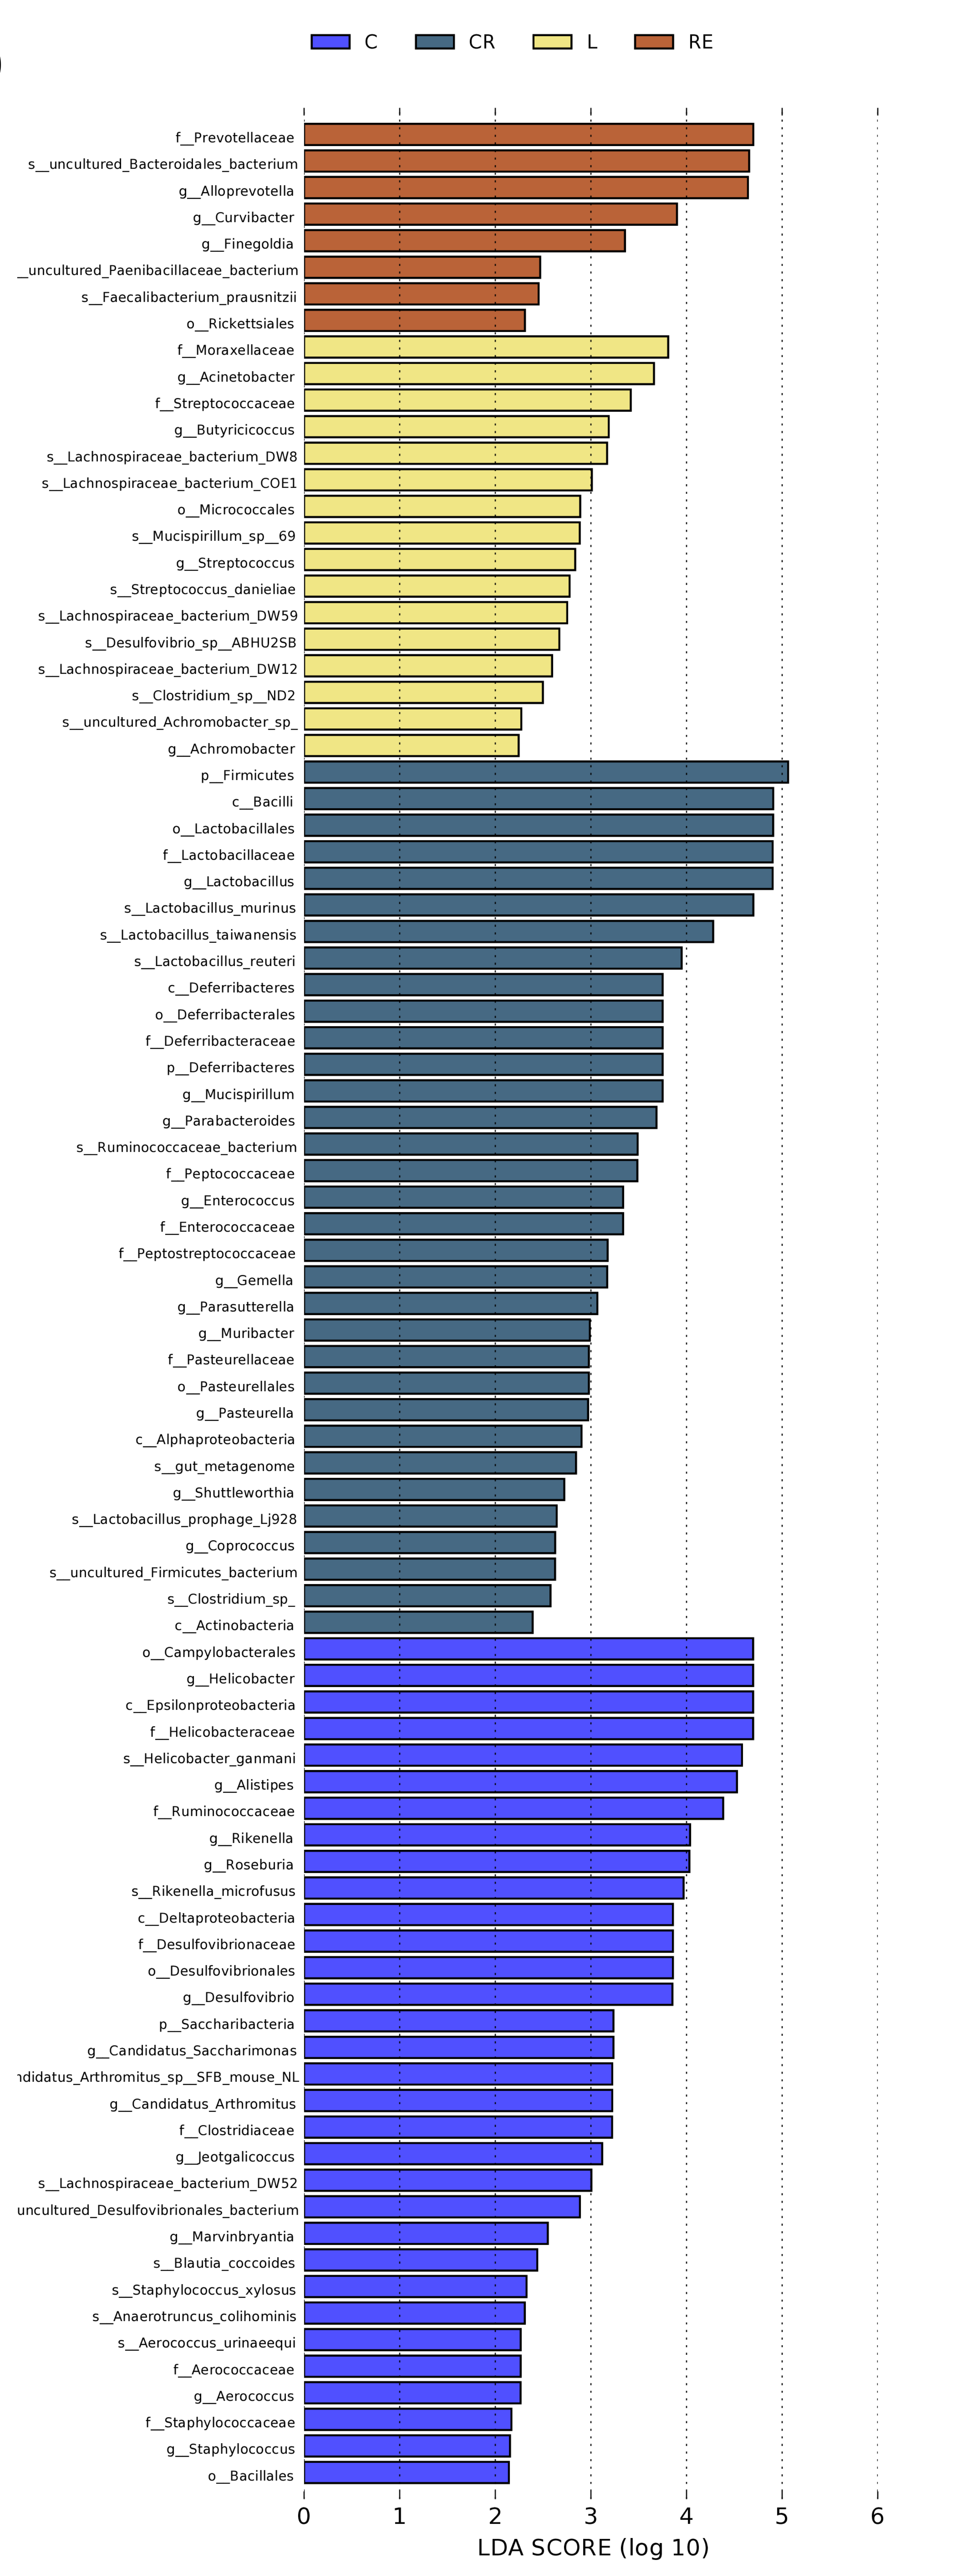


**Figure S11.** LEFSE tree diagram;
